# Supplementary material for: Standard filtration practices may significantly distort planktonic microbial diversity estimates
Source: PubMed Central journal article supplement (PMC4451414; doi:10.3389/fmicb.2015.00547), 2015-06-02
Supplement: Supplementary_Material.pdf [file Supplementary_Material.pdf]

5

**Supplementary Material:**

**Standard filtration practices may significantly distort  
planktonic microbial diversity estimates**

10

15

Cory Padilla, Sangita Ganesh, Shelby Gantt, Alex Huhman, D. Joshua Parris,  
Neha Sarode, Frank J. Stewart

20

25

**Table S1.** Bacterial 16S rRNA gene copies per mL in sample water from experiments 1 and 2. Values are averages across all volume replicates, with standard deviation in parentheses. The ratio of Sterivex to prefilter counts is shown in the last column.

| exp    | Sterivex (0.2-1.6 $\mu\text{m}$ )       | prefilter (>1.6 $\mu\text{m}$ )         | combined                                | ratio<br>(Sterivex/prefilter) |
|--------|-----------------------------------------|-----------------------------------------|-----------------------------------------|-------------------------------|
| 1-150m | $3.7 \times 10^5$ ( $1.1 \times 10^5$ ) | $3.3 \times 10^4$ ( $1.4 \times 10^4$ ) | $4.0 \times 10^5$ ( $1.2 \times 10^5$ ) | 11.1                          |
| 2-400m | $6.4 \times 10^4$ ( $2.2 \times 10^4$ ) | $6.3 \times 10^3$ ( $1.4 \times 10^3$ ) | $7.0 \times 10^4$ ( $2.4 \times 10^4$ ) | 10.3                          |

**Figure S1.** Total bacterial 16S rRNA gene counts as a function of filtered water volume.

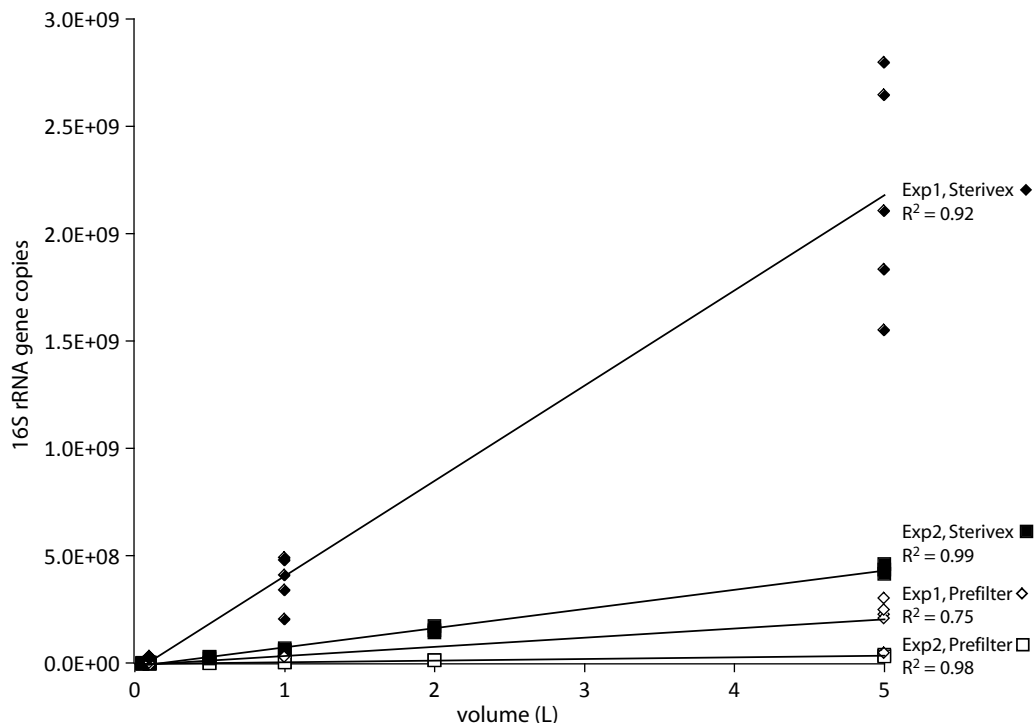

30

**Table S2.** Percentage variation ( $R^2$ ) in weighted UniFrac distances explained by filtered water volume differences, based on adonis tests in QIIME. All P-values are significant following Bonferroni correction for multiple tests.

35

| dataset         | $R^2$ , $P$ -value |
|-----------------|--------------------|
| Exp1, prefilter | 0.87, 0.01         |
| Exp1, Sterivex  | 0.50, 0.001        |
| Exp2, prefilter | 0.74, 0.001        |
| Exp2, Sterivex  | 0.81, 0.001        |

**Table S3.** Abundance of microbial orders in **experiment 1**, expressed as a % of total 16S rRNA gene amplicons.

\* average % of replicates

\*\*positive values: fold increase in abundance from the lowest to the highest filtered volumes;

\*\*negative values: fold increase from the highest to the lowest filtered volumes, multiplied by -1

Shading = significant difference in abundance between lowest vs highest volumes (P<0.05; FDR; baySeq)

**Sterivex filter fraction (0.2-1.6  $\mu$ m)**

| Taxon                                  | Filtered water volume* |      |      | Average (all) | Fold Change** |
|----------------------------------------|------------------------|------|------|---------------|---------------|
|                                        | 0.1L                   | 1L   | 5L   |               |               |
| SAR406, Arctic96B-7                    | 16.2                   | 18.8 | 25.1 | 20.0          | 1.6           |
| Gammaproteobacteria, Oceanospirillales | 12.9                   | 11.2 | 12.5 | 12.2          | -1.0          |
| Alphaproteobacteria, Rickettsiales     | 11.2                   | 11.5 | 10.6 | 11.1          | -1.1          |
| Deltaproteobacteria, Sva0853           | 9.0                    | 10.6 | 9.1  | 9.6           | 1.0           |
| Planctomycetes, Brocadiales            | 9.0                    | 10.0 | 8.5  | 9.2           | -1.1          |
| Gammaproteobacteria, Chromatiales      | 5.3                    | 5.4  | 4.3  | 5.0           | -1.2          |
| Actinobacteria, Acidimicrobiales       | 3.0                    | 3.9  | 3.2  | 3.4           | 1.0           |
| SAR406, AB16, ZA3648c                  | 2.1                    | 3.0  | 3.3  | 2.8           | 1.6           |
| Thaumarchaeota, Cenarchaeales          | 2.7                    | 3.4  | 2.2  | 2.8           | -1.2          |
| Deltaproteobacteria, Desulfobacterales | 2.3                    | 3.2  | 2.4  | 2.6           | 1.0           |
| Gammaproteobacteria, Vibrionales       | 6.7                    | 0.3  | 0.1  | 2.4           | -96.5         |
| Euryarchaeota, Thermoplasmata, E2      | 1.5                    | 2.0  | 3.2  | 2.2           | 2.2           |
| Unassigned                             | 2.1                    | 2.0  | 1.8  | 2.0           | -1.2          |
| Gammaproteobacteria, Thiotrichales     | 1.5                    | 1.9  | 2.5  | 1.9           | 1.7           |
| Chloroflexi, SAR202                    | 1.6                    | 2.1  | 2.0  | 1.9           | 1.3           |
| Alphaproteobacteria, Rhodospirillales  | 1.4                    | 1.8  | 1.5  | 1.6           | 1.0           |
| Gammaproteobacteria, Thiohalorhabdales | 1.1                    | 1.4  | 1.6  | 1.4           | 1.4           |
| Alphaproteobacteria, unassigned        | 0.8                    | 1.2  | 0.8  | 0.9           | -1.0          |
| Gammaproteobacteria, Alteromonadales   | 1.5                    | 0.6  | 0.4  | 0.8           | -3.6          |
| Chloroflexi, Dehalococcoidales         | 0.6                    | 0.7  | 0.5  | 0.6           | -1.1          |
| Bacteroidetes, Flavobacteriales        | 0.4                    | 0.4  | 0.6  | 0.5           | 1.5           |

40

45

50

55

Table S3 continued

## Prefilter fraction (&gt;1.6 µm)

| Taxon                                    | Filtered water volume* |      |      | Average (all) | Fold Change |
|------------------------------------------|------------------------|------|------|---------------|-------------|
|                                          | 0.1L                   | 1L   | 5L   |               |             |
| Gammaproteobacteria, Vibrionales         | 54.1                   | 4.6  | 2.6  | 17.2          | -20.5       |
| Gammaproteobacteria, Thiohalorhabdales   | 4.4                    | 18.8 | 17.0 | 14.1          | 3.8         |
| Euryarchaeota, Thermoplasmata, E2        | 1.0                    | 7.9  | 9.6  | 6.8           | 9.8         |
| SAR406, Arctic96B-7                      | 3.1                    | 7.3  | 6.9  | 6.0           | 2.2         |
| Bacteroidetes, Flavobacteriales          | 1.5                    | 6.7  | 7.0  | 5.4           | 4.7         |
| Gammaproteobacteria, Oceanospirillales   | 4.7                    | 5.2  | 5.1  | 5.0           | 1.1         |
| Unassigned                               | 1.3                    | 6.7  | 6.1  | 4.9           | 4.6         |
| Gammaproteobacteria, Alteromonadales     | 7.4                    | 2.8  | 2.6  | 4.0           | -2.8        |
| Deltaproteobacteria, Myxococcales        | 0.5                    | 3.6  | 4.2  | 3.1           | 8.4         |
| Planctomycetes, Phycisphaerales          | 0.2                    | 3.0  | 3.9  | 2.7           | 15.9        |
| SAR406, ZA3648c                          | 0.7                    | 3.1  | 3.0  | 2.4           | 4.1         |
| Gammaproteobacteria, Thiotrichales       | 0.3                    | 1.8  | 2.9  | 1.9           | 8.7         |
| Gammaproteobacteria, Pseudomonadales     | 5.2                    | 0.8  | 0.2  | 1.7           | -21.6       |
| Alphaproteobacteria, Rickettsiales       | 0.9                    | 2.1  | 1.9  | 1.7           | 2.0         |
| Deltaproteobacteria, unassigned          | 0.1                    | 1.6  | 2.0  | 1.4           | 27.4        |
| Alphaproteobacteria, Rhodobacterales     | 3.9                    | 0.2  | 0.3  | 1.2           | -12.9       |
| Gammaproteobacteria, Chromatiales        | 0.6                    | 1.3  | 1.3  | 1.1           | 2.0         |
| Planctomycetes, Brocadiales              | 0.7                    | 1.2  | 1.2  | 1.1           | 1.6         |
| Alphaproteobacteria, Rhodospirillales    | 0.6                    | 1.1  | 1.3  | 1.1           | 2.2         |
| Planctomycetes, OM190, agg27             | 0.1                    | 1.0  | 1.4  | 0.9           | 15.5        |
| Actinobacteria, Acidimicrobiales         | 0.7                    | 1.1  | 0.8  | 0.9           | 1.2         |
| Chloroflexi, SAR202                      | 0.3                    | 0.9  | 1.0  | 0.8           | 3.6         |
| Planctomycetes, OM190,                   | 0.2                    | 1.1  | 0.9  | 0.8           | 4.9         |
| Verrucomicrobia, Verrucomicrobiales      | 0.1                    | 0.6  | 1.1  | 0.7           | 7.9         |
| Deltaproteobacteria, Desulfobacterales   | 0.4                    | 1.0  | 0.7  | 0.7           | 2.0         |
| Alphaproteobacteria, Sphingomonadales    | 2.1                    | 0.2  | 0.1  | 0.7           | -30.4       |
| Thaumarchaeota, Cenarchaeales            | 0.3                    | 0.7  | 0.7  | 0.6           | 2.6         |
| Epsilonproteobacteria, Campylobacterales | 0.2                    | 0.7  | 0.7  | 0.6           | 3.1         |
| Verrucomicrobia, Arctic97B-4             | 0.2                    | 0.5  | 0.7  | 0.5           | 3.6         |
| Deltaproteobacteria, Sva0853             | 0.4                    | 0.4  | 0.7  | 0.5           | 1.8         |
| Deltaproteobacteria, PB19                | 0.1                    | 0.8  | 0.5  | 0.5           | 6.9         |
| Gammaproteobacteria, Legionellales       | 0.2                    | 0.6  | 0.5  | 0.5           | 2.8         |

60

65

70

**Table S4.** Abundance of microbial orders in **experiment 2**, expressed as a % of total 16S rRNA gene amplicons.

75

\* average % of replicates

\*\*positive values: fold increase in abundance from the lowest to the highest filtered volumes;

\*\*negative values: fold increase from the highest to the lowest filtered volumes, multiplied by -1

Shading = significant difference in abundance between lowest vs highest volumes (P<0.05; FDR; baySeq)

**Sterivex filter fraction (0.2-1.6 µm)**

| Taxon                                       | Filtered water volume* |            |            |            |            |            | Average (all) | Fold Change** |
|---------------------------------------------|------------------------|------------|------------|------------|------------|------------|---------------|---------------|
|                                             | 0.05L                  | 0.1L       | 0.5L       | 1L         | 2L         | 5L         |               |               |
| SAR406, Arctic96B-7                         | 12.3                   | 14.4       | 21.2       | 19.7       | 24.2       | 26.0       | 19.7          | 2.1           |
| Planctomycetes, Brocadiales                 | 16.0                   | 11.3       | 21.7       | 19.7       | 20.0       | 15.6       | 17.4          | -1.0          |
| Unassigned                                  | 4.4                    | 4.6        | 6.9        | 6.5        | 7.4        | 8.8        | 6.4           | 2.0           |
| Alphaproteobacteria, Rickettsiales          | 4.5                    | 3.9        | 7.6        | 7.0        | 7.5        | 6.7        | 6.2           | 1.5           |
| <b>Gammaproteobacteria, Vibrionales</b>     | <b>22.0</b>            | <b>7.8</b> | <b>2.4</b> | <b>0.6</b> | <b>0.2</b> | <b>0.4</b> | <b>5.6</b>    | <b>-51.0</b>  |
| Gammaproteobacteria, Chromatiales           | 1.3                    | 7.0        | 2.3        | 12.3       | 1.4        | 2.3        | 4.4           | 1.8           |
| Deltaproteobacteria, Sva0853                | 3.6                    | 3.1        | 5.4        | 4.9        | 5.1        | 4.3        | 4.4           | 1.2           |
| Chloroflexi, SAR202                         | 2.0                    | 1.9        | 3.2        | 3.0        | 4.4        | 4.2        | 3.1           | 2.1           |
| Actinobacteria, Acidimicrobiales            | 2.4                    | 2.4        | 3.2        | 2.8        | 3.2        | 3.0        | 2.8           | 1.2           |
| Gammaproteobacteria, Oceanospirillales      | 2.6                    | 2.4        | 2.7        | 2.4        | 2.6        | 2.7        | 2.6           | 1.0           |
| Alphaproteobacteria, Rhodospirillales       | 2.1                    | 1.9        | 2.8        | 2.6        | 3.0        | 2.6        | 2.5           | 1.3           |
| <b>Gammaproteobacteria, Alteromonadales</b> | <b>4.9</b>             | <b>4.6</b> | <b>1.2</b> | <b>0.5</b> | <b>0.4</b> | <b>0.3</b> | <b>2.0</b>    | <b>-15.6</b>  |
| SAR406, ZA3648c                             | 1.0                    | 1.1        | 2.1        | 2.0        | 2.3        | 2.4        | 1.8           | 2.3           |
| Chloroflexi, Dehalococcoidales              | 1.0                    | 1.0        | 1.5        | 1.4        | 2.1        | 1.8        | 1.5           | 1.7           |
| <b>Euryarchaeota, Thermoplasmata, E2</b>    | <b>0.6</b>             | <b>1.1</b> | <b>1.1</b> | <b>1.1</b> | <b>1.9</b> | <b>2.8</b> | <b>1.4</b>    | <b>4.4</b>    |
| Crenarchaeota, MBGA                         | 1.2                    | 1.0        | 1.7        | 1.4        | 1.7        | 1.5        | 1.4           | 1.3           |
| Gammaproteobacteria, Thiohalorhabdals       | 0.9                    | 1.2        | 1.2        | 1.0        | 1.4        | 2.4        | 1.4           | 2.8           |
| <b>Alphaproteobacteria, Kiloniellales</b>   | <b>3.3</b>             | <b>4.0</b> | <b>0.2</b> | <b>0.1</b> | <b>0.0</b> | <b>0.0</b> | <b>1.3</b>    | <b>-93.6</b>  |
| Gammaproteobacteria, Thiotrichales          | 0.7                    | 0.8        | 1.3        | 1.1        | 1.3        | 1.5        | 1.1           | 2.0           |
| Thaumarchaeota, Cenarchaeales               | 1.0                    | 0.5        | 1.3        | 1.3        | 1.3        | 1.2        | 1.1           | 1.2           |
| Deltaproteobacteria, Desulfobacterales      | 0.9                    | 1.1        | 1.4        | 1.1        | 1.1        | 1.0        | 1.1           | 1.2           |
| <b>Alphaproteobacteria, Rhodobacterales</b> | <b>4.1</b>             | <b>1.4</b> | <b>0.3</b> | <b>0.1</b> | <b>0.1</b> | <b>0.0</b> | <b>1.0</b>    | <b>-85.7</b>  |
| Bacteroidetes, Flavobacteriales             | 0.2                    | 2.8        | 0.4        | 0.4        | 0.3        | 0.9        | 0.8           | 3.7           |
| Planctomycetes, Planctomycetales            | 0.0                    | 4.5        | 0.0        | 0.1        | 0.0        | 0.0        | 0.8           | -11.4         |
| Deltaproteobacteria, Entothionellales       | 0.6                    | 0.6        | 1.0        | 0.7        | 0.9        | 0.8        | 0.8           | 1.2           |
| Acidobacteria, iii1-15                      | 0.6                    | 0.4        | 0.7        | 0.6        | 0.8        | 0.7        | 0.6           | 1.2           |
| Betaproteobacteria, Methylophilales         | 0.0                    | 3.8        | 0.0        | 0.0        | 0.0        | 0.0        | 0.6           | -1.2          |
| Chloroflexi, H39                            | 0.2                    | 0.3        | 0.5        | 0.6        | 0.6        | 0.7        | 0.5           | 3.5           |

80

85

## 90 Table S4 continued

## Prefilter fraction (&gt;1.6 µm)

| Taxon                                    | Filtered water volume* |      |      |      |      |      | Average (all) | Fold Change |
|------------------------------------------|------------------------|------|------|------|------|------|---------------|-------------|
|                                          | 0.05L                  | 0.1L | 0.5L | 1L   | 2L   | 5L   |               |             |
| Gammaproteobacteria, Vibrionales         | 62.2                   | 49.6 | 38.5 | 4.7  | 2.6  | 1.9  | 26.6          | -33.4       |
| Gammaproteobacteria, Chromatiales        | 2.2                    | 1.4  | 2.8  | 27.9 | 58.1 | 38.7 | 21.8          | 17.6        |
| Gammaproteobacteria, Alteromonadales     | 8.1                    | 8.8  | 7.5  | 2.3  | 1.6  | 1.8  | 5.0           | -4.5        |
| SAR406, Arctic96B-7                      | 0.9                    | 4.2  | 7.0  | 7.0  | 4.2  | 6.6  | 5.0           | 7.7         |
| Gammaproteobacteria, Oceanospirillales   | 7.5                    | 7.9  | 4.4  | 3.4  | 2.0  | 1.7  | 4.5           | -4.4        |
| Euryarchaeota, Thermoplasmata, E2        | 0.4                    | 2.0  | 4.5  | 6.2  | 4.2  | 7.1  | 4.1           | 19.5        |
| Unassigned                               | 0.6                    | 2.6  | 5.3  | 5.9  | 3.3  | 4.4  | 3.7           | 7.1         |
| Gammaproteobacteria, Thiohalorhabdales   | 0.6                    | 1.4  | 3.3  | 7.5  | 2.6  | 4.6  | 3.3           | 7.6         |
| Firmicutes, Bacillales                   | 5.1                    | 4.3  | 1.0  | 0.3  | 0.0  | 0.5  | 1.9           | -10.2       |
| Epsilonproteobacteria, Campylobacterales | 0.1                    | 0.2  | 0.9  | 2.7  | 4.2  | 1.9  | 1.7           | 20.0        |
| Alphaproteobacteria, Rickettsiales       | 0.4                    | 1.1  | 2.5  | 2.3  | 1.4  | 2.0  | 1.6           | 4.7         |
| Bacteroidetes, Flavobacteriales          | 0.3                    | 1.0  | 1.5  | 3.0  | 1.5  | 1.4  | 1.5           | 4.2         |
| Planctomycetes, Brocadiales              | 0.6                    | 1.6  | 2.4  | 1.6  | 1.2  | 1.3  | 1.4           | 2.3         |
| Gammaproteobacteria, Thiotrichales       | 0.0                    | 0.5  | 1.3  | 2.4  | 1.4  | 2.5  | 1.3           | 65.0        |
| Alphaproteobacteria, Rhodobacterales     | 3.2                    | 2.4  | 0.7  | 0.1  | 0.2  | 0.1  | 1.1           | -49.0       |
| Alphaproteobacteria, Rhodospirillales    | 0.3                    | 0.8  | 1.5  | 1.9  | 0.6  | 1.2  | 1.0           | 4.5         |
| SAR406, ZA3648c                          | 0.2                    | 0.6  | 1.3  | 2.4  | 0.6  | 0.9  | 1.0           | 5.2         |
| Chloroflexi, SAR202,                     | 0.2                    | 0.7  | 1.6  | 1.3  | 0.5  | 0.9  | 0.9           | 4.1         |
| Deltaproteobacteria, Myxococcales        | 0.2                    | 0.4  | 0.5  | 1.4  | 0.5  | 1.4  | 0.8           | 8.5         |
| Planctomycetes, Phycisphaerales          | 0.2                    | 0.5  | 0.4  | 1.9  | 0.2  | 1.1  | 0.7           | 6.3         |
| Actinobacteria, Acidimicrobiales         | 0.2                    | 0.3  | 1.2  | 0.8  | 0.7  | 0.8  | 0.7           | 4.8         |
| Alphaproteobacteria, Kiloniellales       | 1.6                    | 1.3  | 0.3  | 0.0  | 0.0  | 0.1  | 0.6           | -23.2       |
| Alphaproteobacteria, Sphingomonadales    | 1.0                    | 0.7  | 0.0  | 0.0  | 0.0  | 1.2  | 0.5           | 1.2         |
| Bacteroidetes, Bacteroidales             | 0.1                    | 0.1  | 0.4  | 0.4  | 0.8  | 0.9  | 0.5           | 10.9        |
